# Supplementary material for: Prevalence and correlates of advance care directives among older Australians accessing health and residential aged care services: multicentre audit study
Source: PubMed Central journal article supplement — BMJ Open. 2019 Jan 15;9(1):e025255. doi: 10.1136/bmjopen-2018-025255 (PMC6340468; doi:10.1136/bmjopen-2018-025255), 2019-01-15
Supplement: bmjopen-2018-025255supp001.pdf [file bmjopen-2018-025255supp001.pdf]

## Appendix 1

**Table 1** Advance care planning statutory and non-statutory documentation, per jurisdiction.

| Jurisdiction | Statutory ACD – preferences for care                                                             | Statutory ACD – appointing a SDM                                                                                                                                            | Non-statutory ACD †                                                                         |
|--------------|--------------------------------------------------------------------------------------------------|-----------------------------------------------------------------------------------------------------------------------------------------------------------------------------|---------------------------------------------------------------------------------------------|
| <b>ACT</b>   | Health Direction                                                                                 | Enduring Power of Attorney (Healthcare Matters)                                                                                                                             | Advance Care Directive<br>Advance Care Plan<br>Statement of Choices                         |
| <b>NSW</b>   | -                                                                                                | Enduring Guardian                                                                                                                                                           | Advance Care Directive<br>Advance Care Plan<br>Statement of Values and Wishes               |
| <b>NT</b>    | Advance Personal Plan<br>Direction under Natural Death Act (prior to 1 July 2014)                | Advance Personal Plan – Substitute Decision-Maker Appointment                                                                                                               | Advance Care Directive<br>Advance Care Plan                                                 |
| <b>QLD</b>   | Advance Health Directive                                                                         | Enduring Power of Attorney<br>Advance Health Directive (Section 6 and Section 7)                                                                                            | Statement of Choices – persons with decision-making capacity<br>Blue Care Advance Care Plan |
| <b>SA</b>    | Advance Care Directive<br>Anticipatory Direction (prior to 1 July 2014)                          | Advance Care Directive - Substitute Decision-Maker Appointment<br>Medical Power of Attorney (prior to 1 July 2014)<br>Enduring Power of Guardianship (prior to 1 July 2014) | Advance Care Plan<br>Statement of Choices                                                   |
| <b>TAS</b>   | -                                                                                                | Enduring Guardian                                                                                                                                                           | Advance Care Directive<br>Advance Care Plan                                                 |
| <b>VIC</b>   | Refusal of Treatment Certificate (Competent)<br>Refusal of Treatment Certificate (Non-Competent) | Enduring Power of Attorney (Medical Treatment)<br>Enduring Power of Guardianship (prior to 31 August 2015)                                                                  | Advance Care Directive<br>Advance Care Plan<br>Statement of Choices                         |

Enduring Power of Attorney  
(Personal Matters) (from 1  
September 2015)

|           |                          |                   |                                             |
|-----------|--------------------------|-------------------|---------------------------------------------|
| <b>WA</b> | Advance Health Directive | Enduring Guardian | Advance Care Directive<br>Advance Care Plan |
|-----------|--------------------------|-------------------|---------------------------------------------|

---

† Given the variability of non-statutory advance care directives across jurisdictions, this may not represent an exhaustive list.

Notes: ACT = Australian Capital Territory; NSW = New South Wales; NT = Northern Territory; QLD = Queensland; SA = South Australia; SDM = substitute decision maker; TAS = Tasmania; VIC = Victoria; WA = Western Australia.

**Table 2** Permissions in statutory advance care directives by jurisdiction.

| <b>Jurisdiction</b>       | <b>Medical treatment -<br/>consent</b> | <b>Medical treatment<br/>- refusal</b> | <b>Values</b> |
|---------------------------|----------------------------------------|----------------------------------------|---------------|
| ACT                       | No                                     | Yes                                    | No            |
| QLD                       | Yes                                    | Yes                                    | No            |
| NSW                       | N/A                                    | N/A                                    | N/A           |
| NT                        | Yes                                    | Yes                                    | Yes           |
| SA                        | No                                     | Yes                                    | Yes           |
| TAS                       | N/A                                    | N/A                                    | N/A           |
| VIC (until 18 March 2018) | No                                     | Yes                                    | No            |
| VIC (after 18 March 2018) | Yes                                    | Yes                                    | Yes           |
| WA                        | No                                     | Yes                                    | No            |

Notes: ACT = Australian Capital Territory; NSW = New South Wales; NT = Northern Territory; QLD = Queensland; SA = South Australia; TAS = Tasmania; VIC = Victoria; WA = Western Australia.

## Appendix 2

**Table 1** Names of non-statutory advance care directives identified by data collectors during the audit.

| <b>Document name</b>                               | <b>Frequency<br/><i>n</i></b> |
|----------------------------------------------------|-------------------------------|
| Advance Care Directive                             | 10                            |
| Advance Care Plan                                  | 70                            |
| Advance Care Plan Discussion Record                | 1                             |
| Advance Care Record                                | 30                            |
| Advance Health Care Directive                      | 1                             |
| Austin Health Non-statutory Advance Care Plan      | 2                             |
| BaptistCare Advanced Care Record                   | 47                            |
| Benetas End of Life Wishes                         | 1                             |
| Chamberlain Gardens Palliative Care Wishes         | 1                             |
| Christadelphian Aged Care Advance Care Directive   | 40                            |
| Christadelphian Aged Care Advance Health Directive | 105                           |
| Declaration of Life                                | 1                             |
| Good Palliative Care Plan                          | 10                            |
| Let Me Decide                                      | 2                             |
| Living Will                                        | 2                             |
| New South Wales Advance Care Directive             | 1                             |
| Palliative Care Plan                               | 22                            |
| Palliative Care Preferences                        | 1                             |
| Plan of Plan                                       | 1                             |
| Residential Aged Care End Of Life Care Choices     | 1                             |
| Respecting Patient Choices Advance Care Plan       | 33                            |
| Statement of Choices                               | 66                            |
| Statement of Views                                 | 21                            |
| Statutory Declaration                              | 1                             |
| Document not found in file                         | 7                             |

### Appendix 3

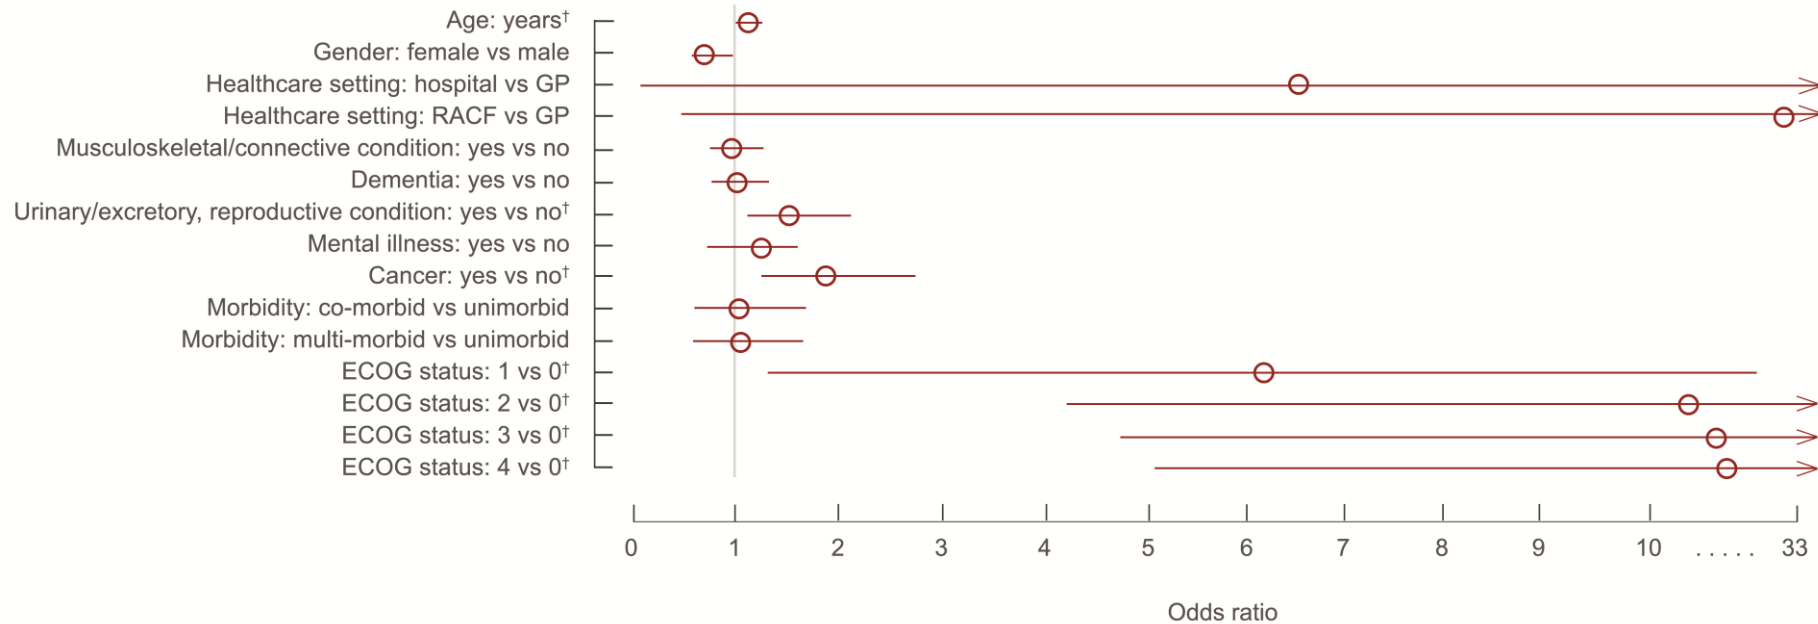

**Figure 1.** Odds ratios for factors associated with having at least one advance care directive after the data were weighted for age, gender and jurisdiction ( $n = 1,601$ ).

*Note.* Note:  $R^2 = .33$  (Nagelkerke). Model  $\chi^2(15) = 372.40, p < .001$ . Bars represent 95% CIs. Factors for which the 95%CI does not include the value of 1 (indicated by the grey line) are statistically significant. An OR of 1 indicates no association between a predictor variable and the odds of having an ACD. †  $p < .05$  compared with reference category. ECOG = Eastern Cooperative Oncology Group; GP = general practice; RACF = residential aged care facility.

## Appendix 4

**Table 1** Names of other advance care planning documentation identified by data collectors during the audit.

| Document name                                      | Frequency<br><i>n</i> |
|----------------------------------------------------|-----------------------|
| Advance Care Directive Association New South Wales | 1                     |
| Advance Care Plan                                  | 5                     |
| Advance Care Plan – non-competent                  | 1                     |
| Advance Care Plan – Vasey RSL                      | 1                     |
| Advance Care Plan refusal                          | 1                     |
| Advance Care Plan template                         | 1                     |
| Advance Care Planning invitation                   | 15                    |
| Advance Care Profile                               | 48                    |
| Anglicare Advance Care Plan                        | 147                   |
| BaptistCare Advance Care Record                    | 27                    |
| BaptistCare Carey Gardens                          | 3                     |
| BaptistCare End of Life document                   | 1                     |
| Benetas End of Life Statement                      | 1                     |
| Declaration of Commitment                          | 1                     |
| Declaration of Wishes                              | 1                     |
| Discussion care electronic alert                   | 1                     |
| Discussion Record                                  | 14                    |
| Enduring Guardianship template                     | 6                     |
| Enduring Power of Attorney template                | 2                     |
| Good Palliative Care                               | 12                    |
| GP Management Plan                                 | 2                     |
| Guardianship and Administrative Order              | 1                     |
| Healthcare worker notes                            | 5                     |
| Informal wishes                                    | 1                     |
| Legal document                                     | 1                     |
| Letter                                             | 5                     |
| Palliative Care Plan                               | 4                     |
| Part of Comprehensive Medical Assessment           | 1                     |
| Policy form                                        | 2                     |
| Residential Aged Care Facility document            | 1                     |
| Resuscitation Alert                                | 5                     |
| Resuscitation and Goals of Management              | 24                    |
| Resuscitation Plan                                 | 57                    |
| Terminal Care Wishes                               | 23                    |
| Terminal Care Wishes consultation                  | 1                     |
| Unnamed                                            | 2                     |
| VCAT Guardianship List                             | 1                     |
| Document not found in file                         | 68                    |

Notes: GP = General practitioner; RSL = Returned Services League; VCAT = Victorian Civil and Administrative Tribunal.
